# Supplementary material
Source: Research Square preprint supplement (doi:10.21203/rs.3.rs-8727465/v1)

| **shear bond strength (MPa)** | | |
| --- | --- | --- |
| **control** | **curodont** | **GC** |
| 5.93 | 25.33 | 24.67 |
| 16.11 | 15.14 | 19.35 |
| 11.92 | 8.87 | 26.16 |
| 22.37 | 27.24 | 25.66 |
| 3.77 | 27.68 | 16.53 |
| 22 | 20.96 | 24.91 |
| 14.68 | 24.95 | 14.38 |
| 33.9 | 11.47 | 13.21 |
| 0 | 18.75 | 25.52 |
| 20.42 | 24.24 | 26.48 |
| 10.59 | 33.13 | 6.2 |
| 25.92 | 37.07 | 26.82 |
| 16.76 | 15.13 | 18.27 |
| 15.44 | 31.53 | 9.71 |
| 28.63 | 0 | 6.02 |
| 18.61 | 31.83 | 37.32 |
| 27.87 | 13.62 | 25.06 |
| 20.67 | 21.85 | 10.87 |
| 23.35 | 10.47 | 15.81 |
| 15 | 4.58 | 7.84 |
| 10.92 | 3.96 | 25.69 |
| 30.3 | 22.42 | 19.31 |
| 10.76 | 10.61 | 12.16 |
| 14.4 | 39.8 | 26.78 |
| 33.57 | 21.11 | 23.82 |
| 9.75 | 21.29 | 31.73 |
| 12.85 | 27.88 | 61.86 |
| 21.84 | 15.12 | 24.24 |
| 26.47 | 21.79 | 18.01 |
| 40.51 | 19.71 | 5.86 |

S1: Raw data of individual shear bond strengths of different groups

S2: Pre Control


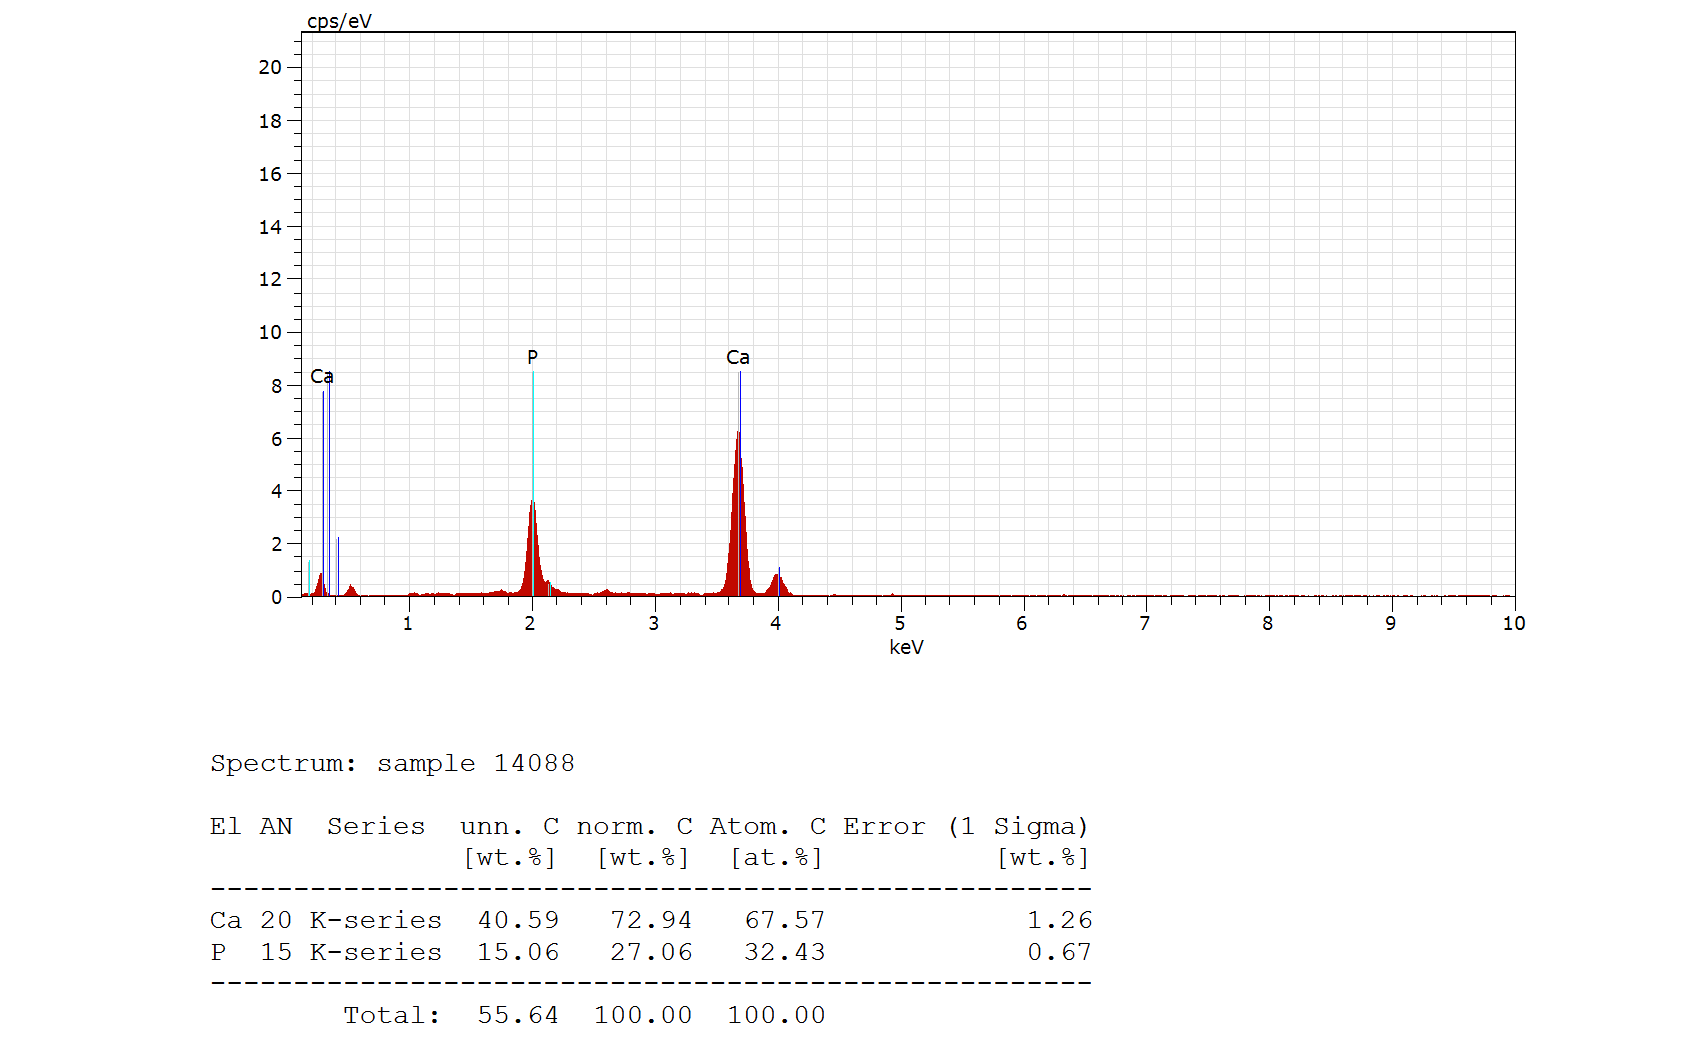

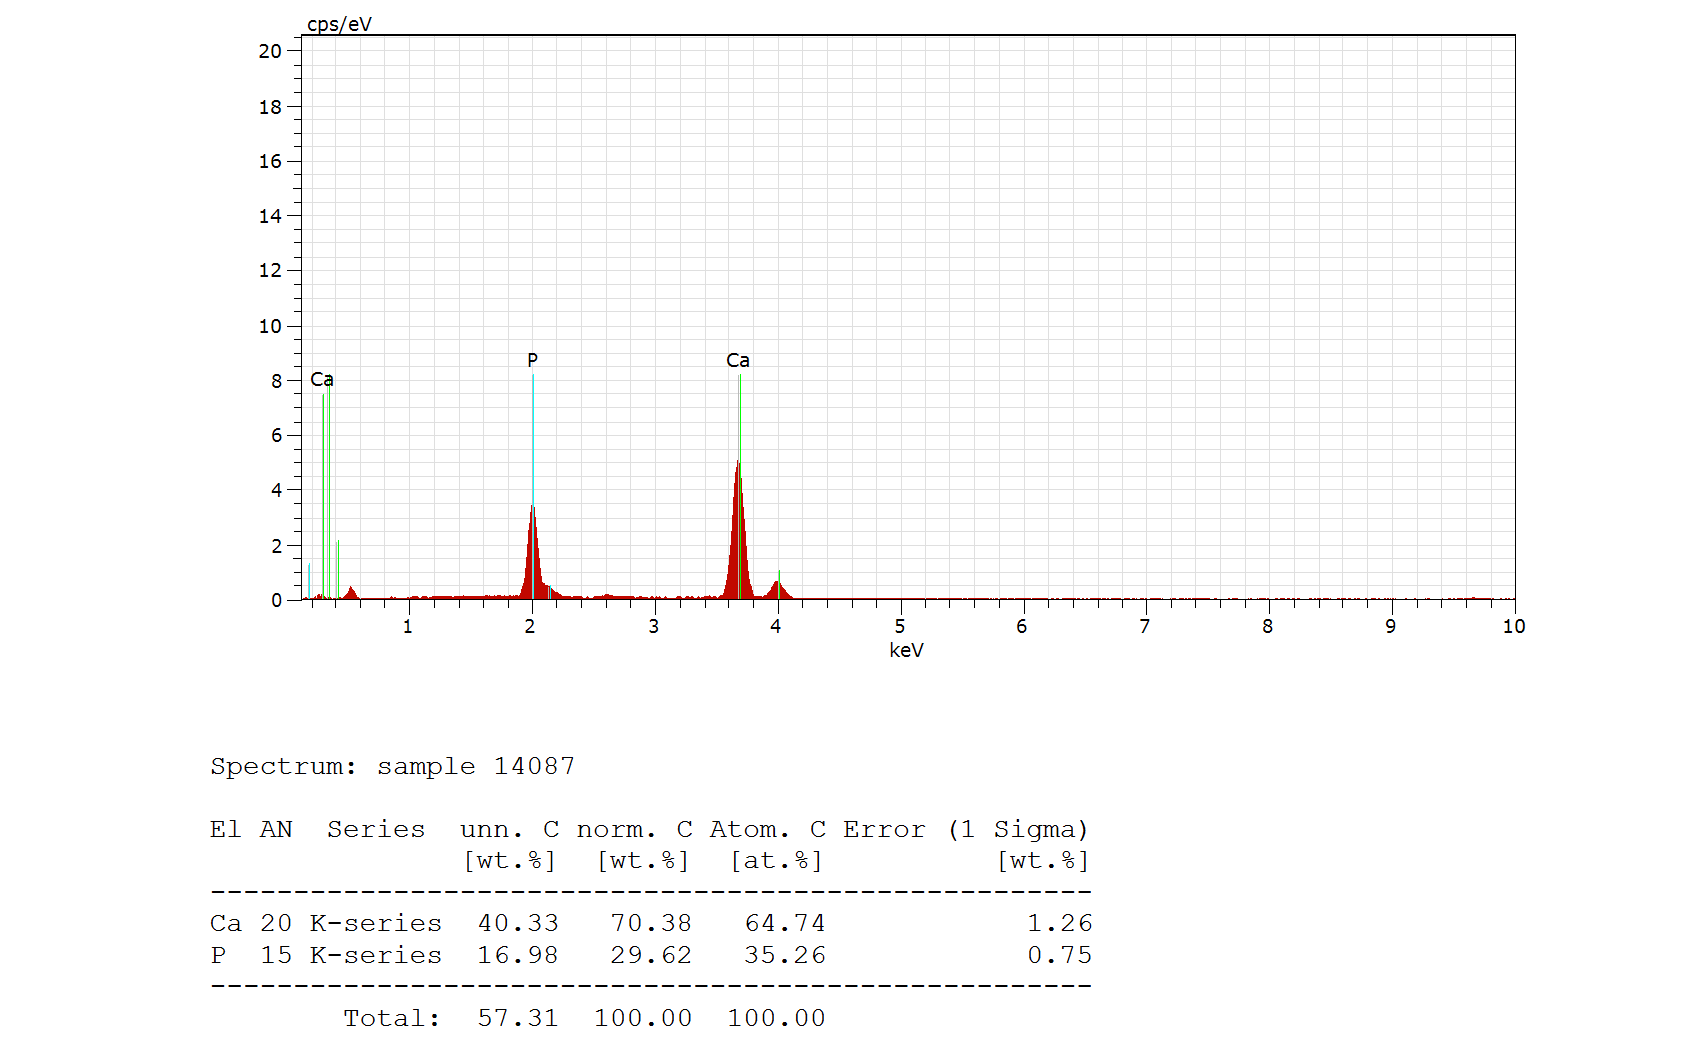


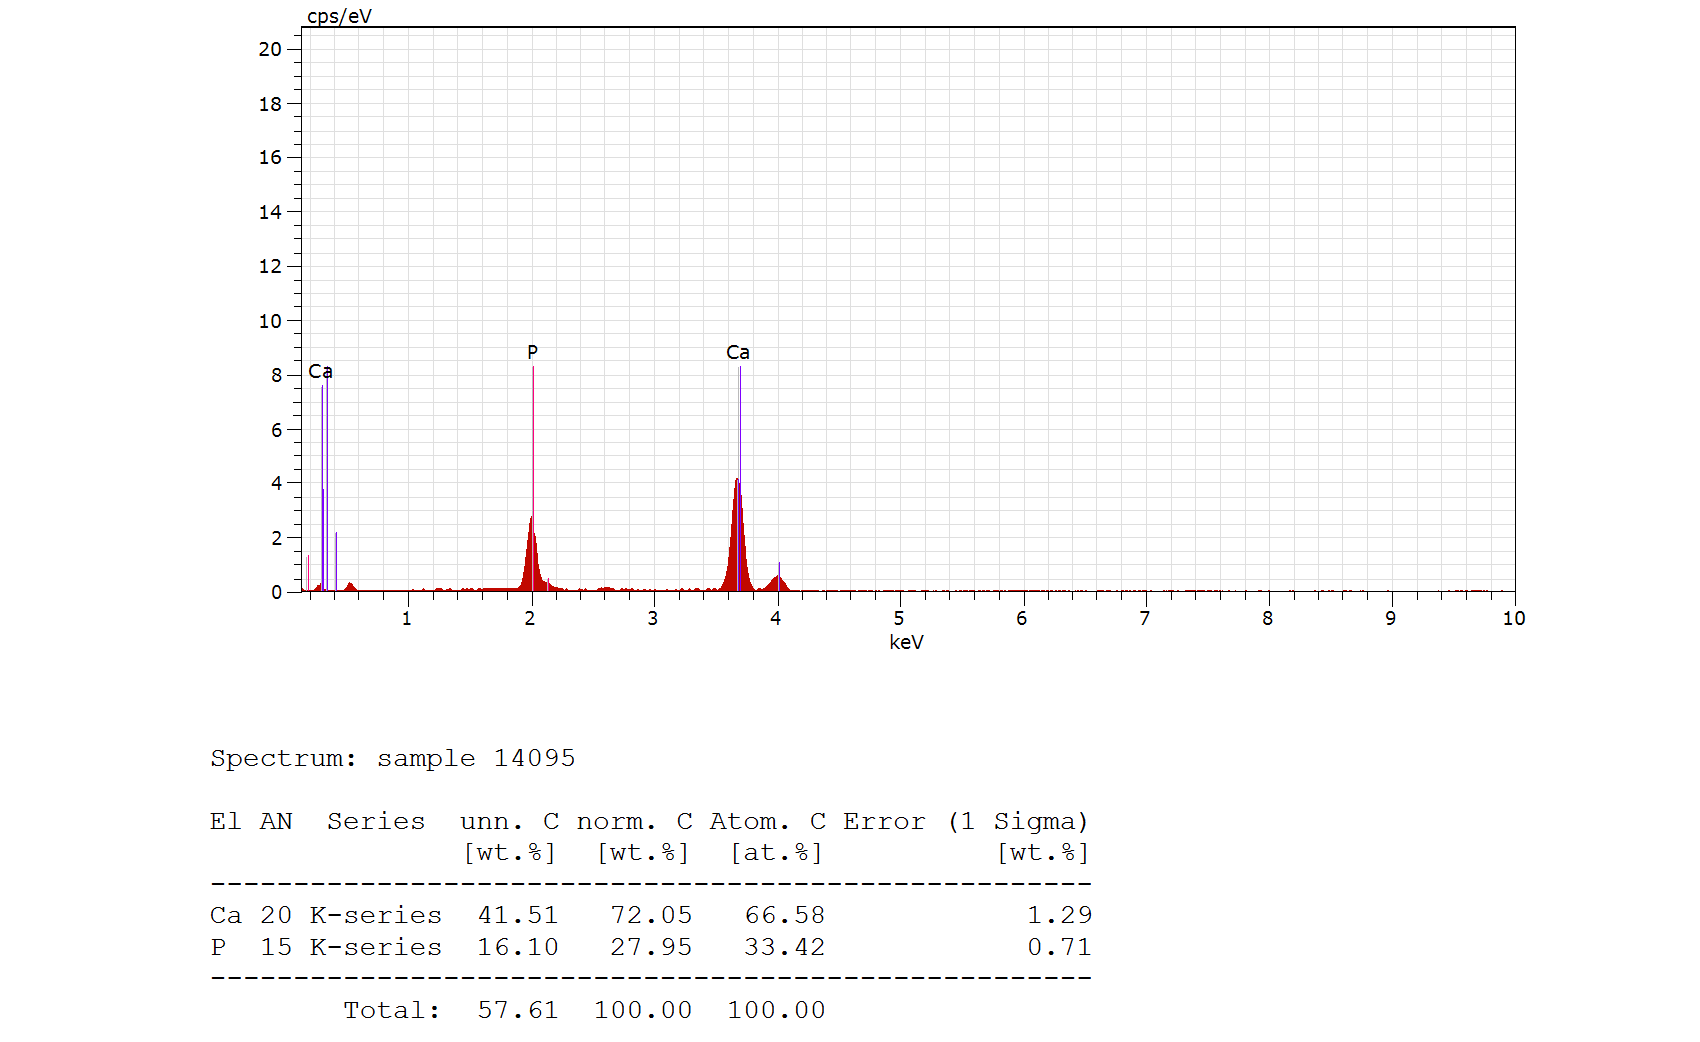

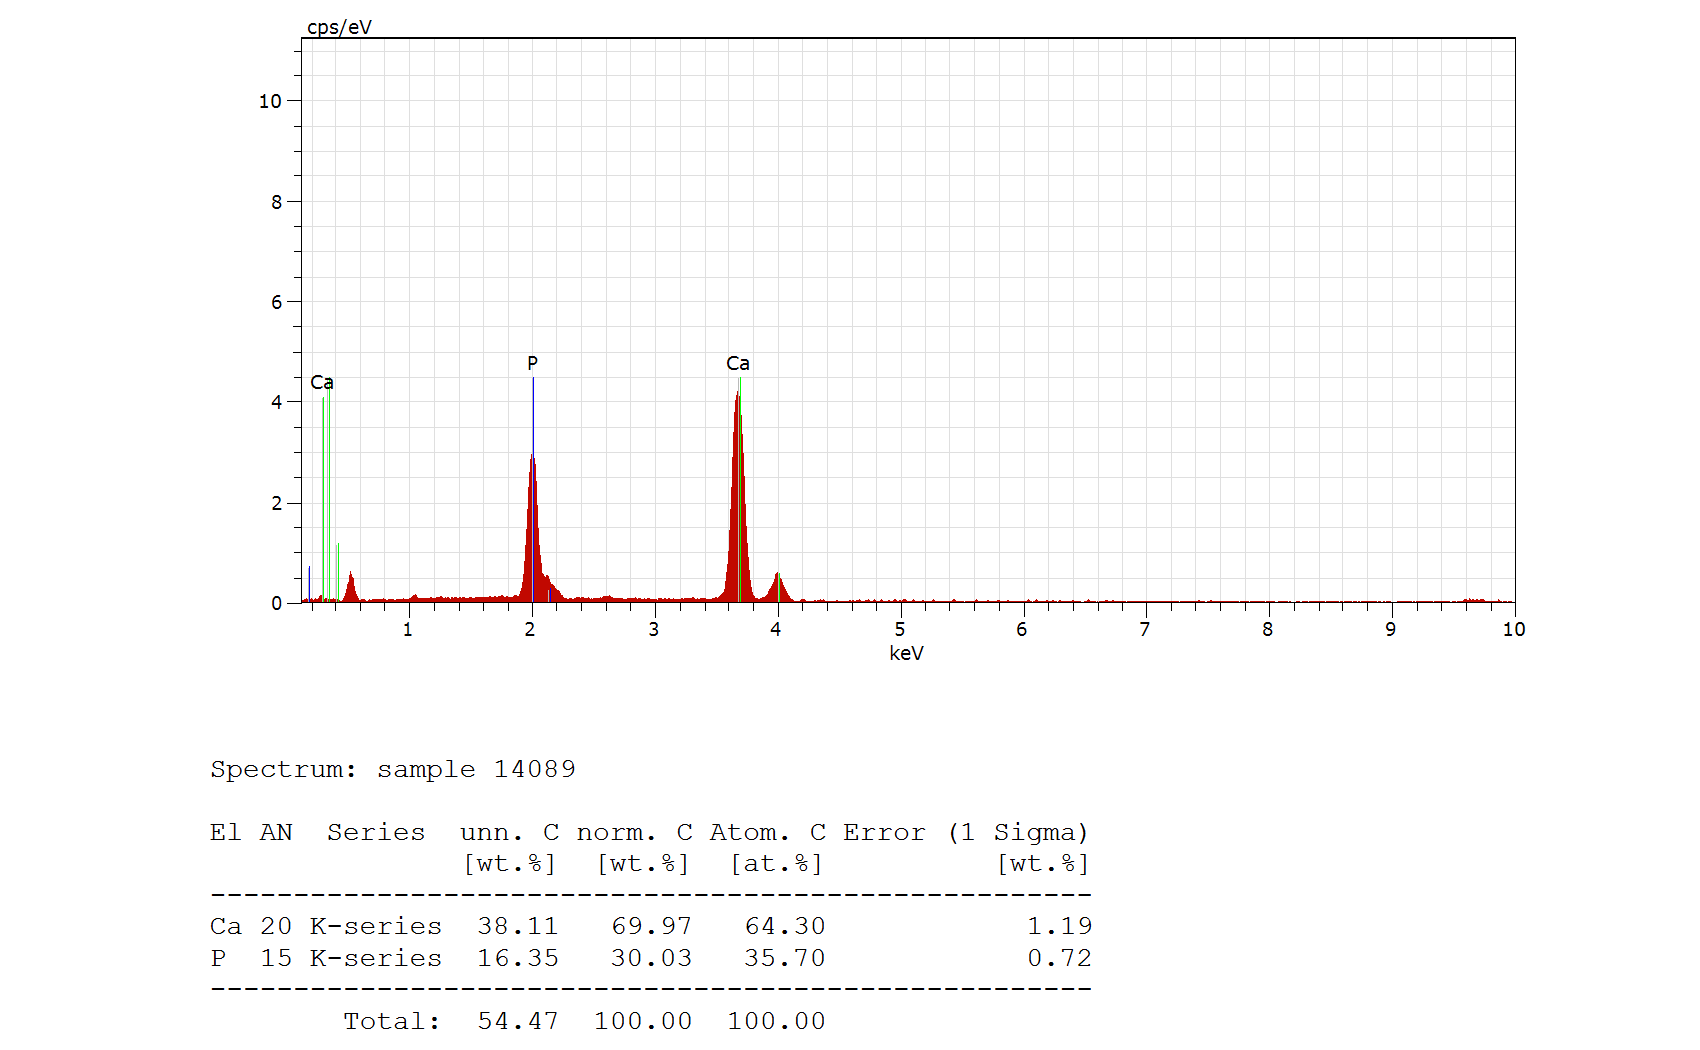


S3: Post Control


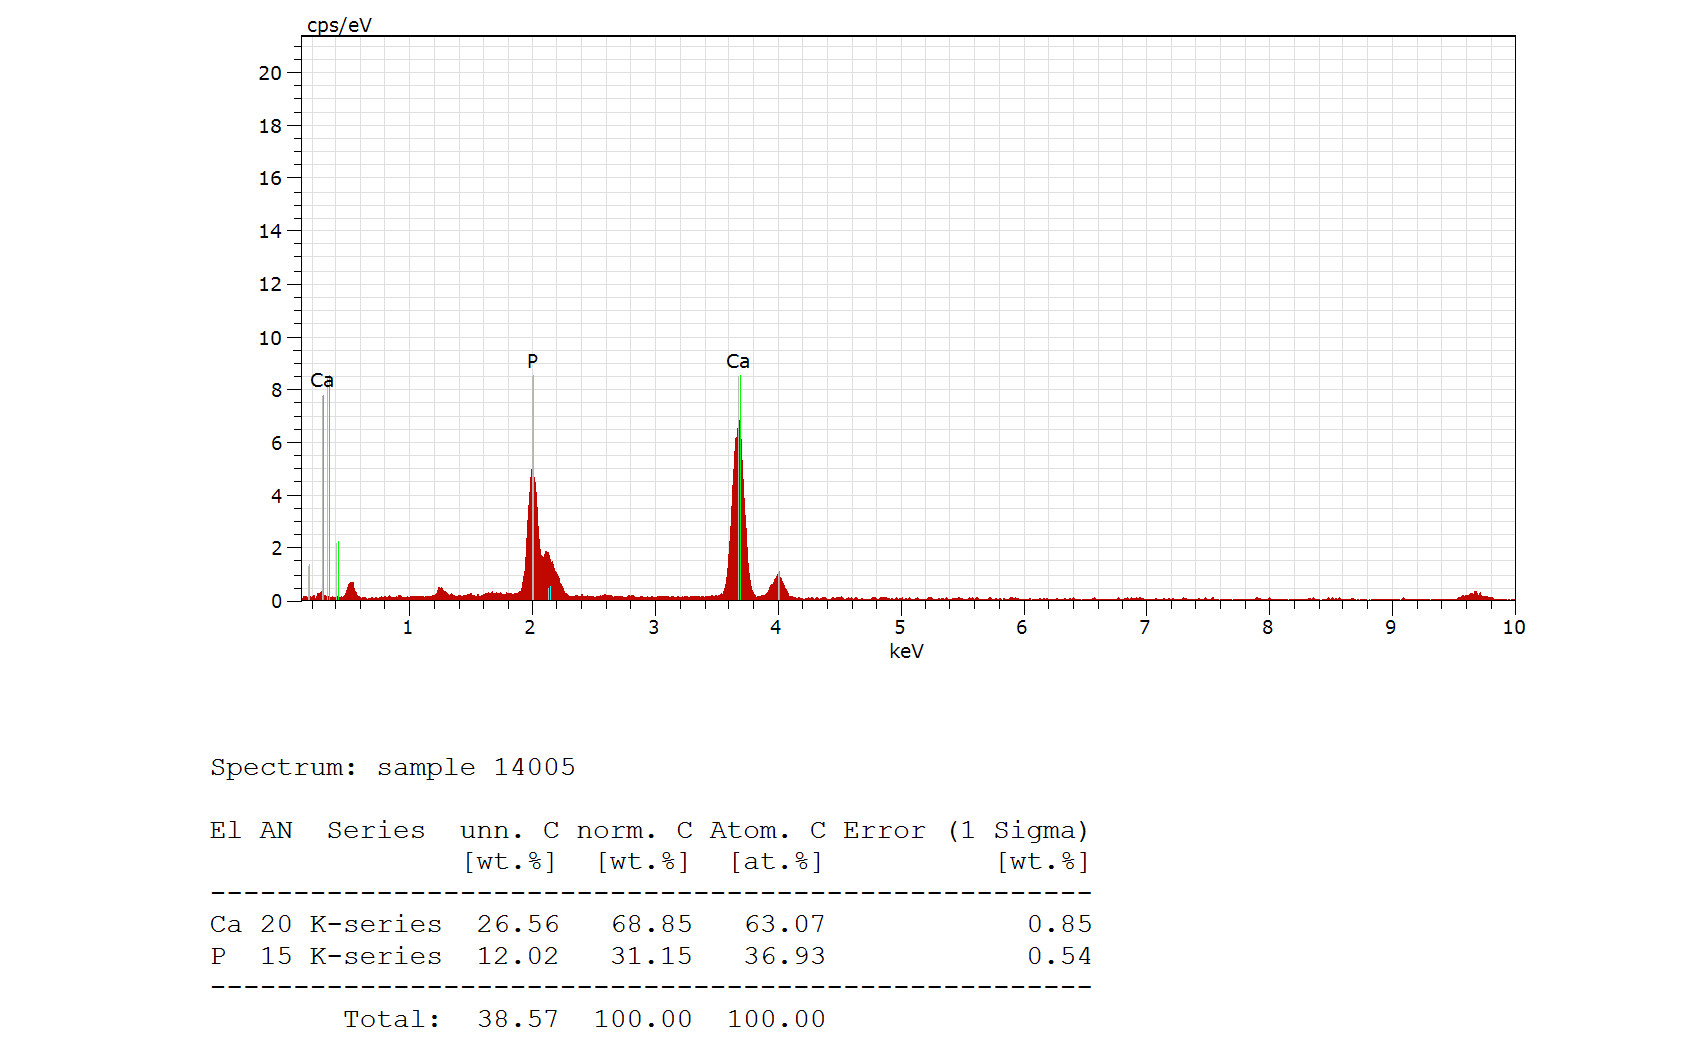

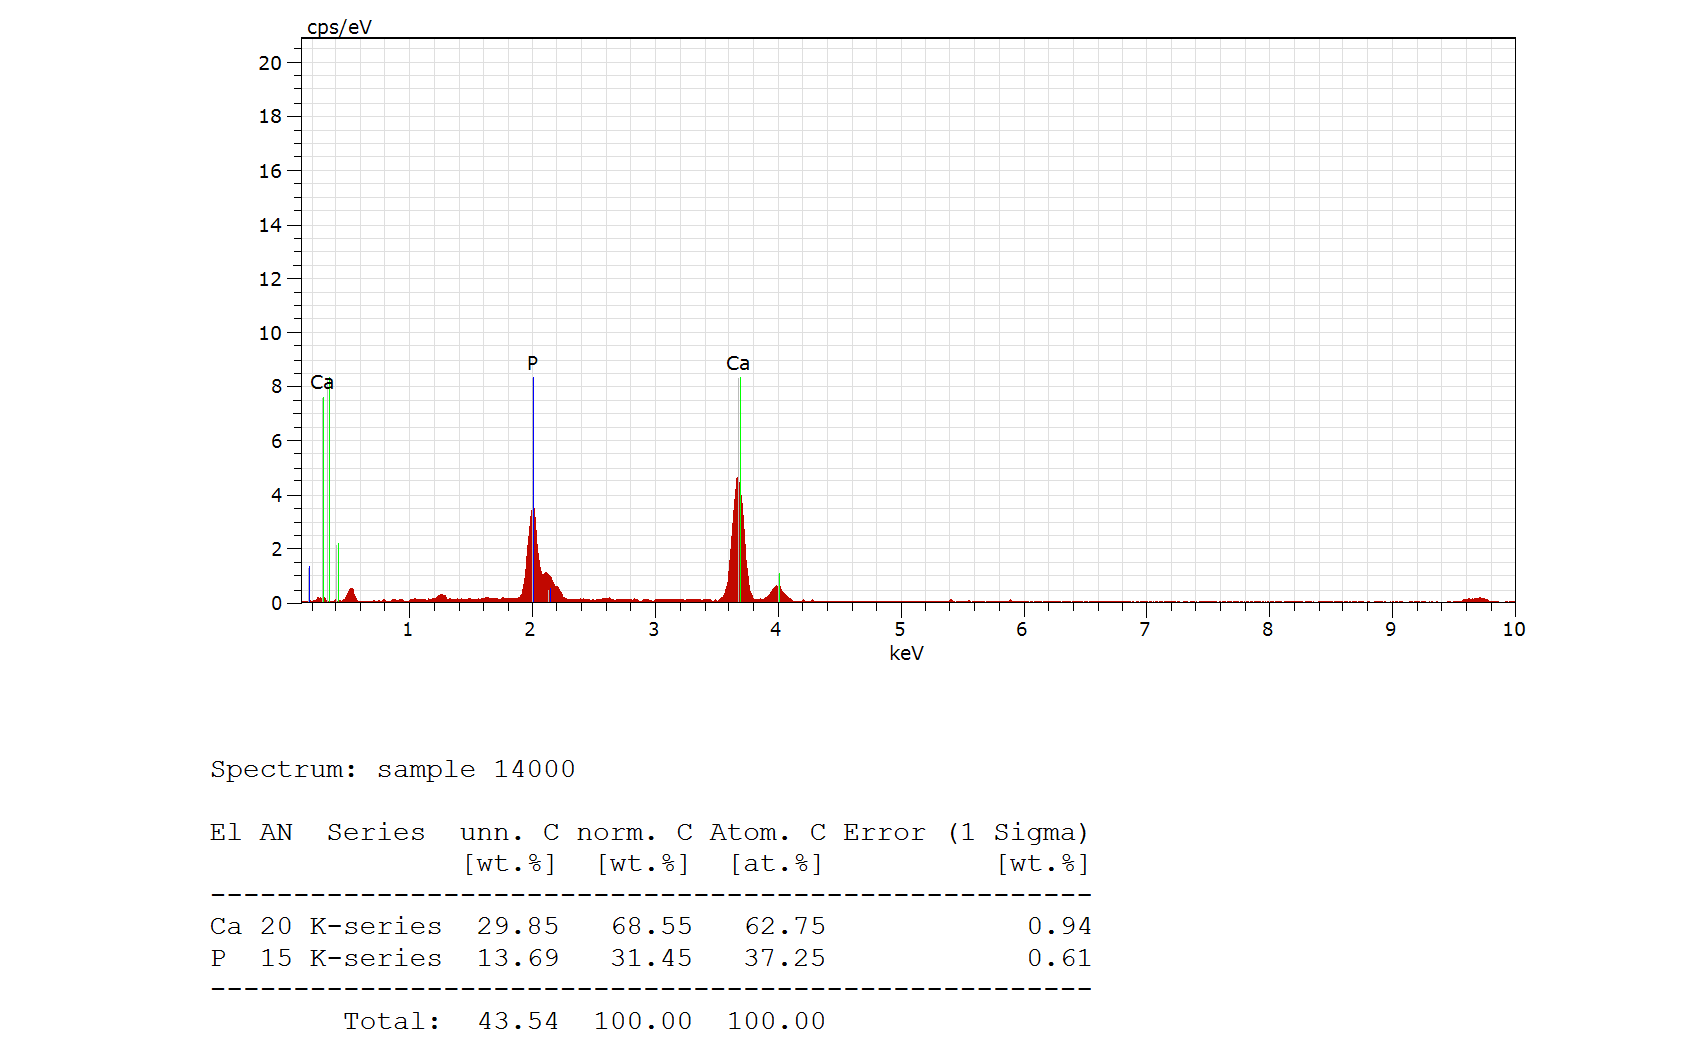


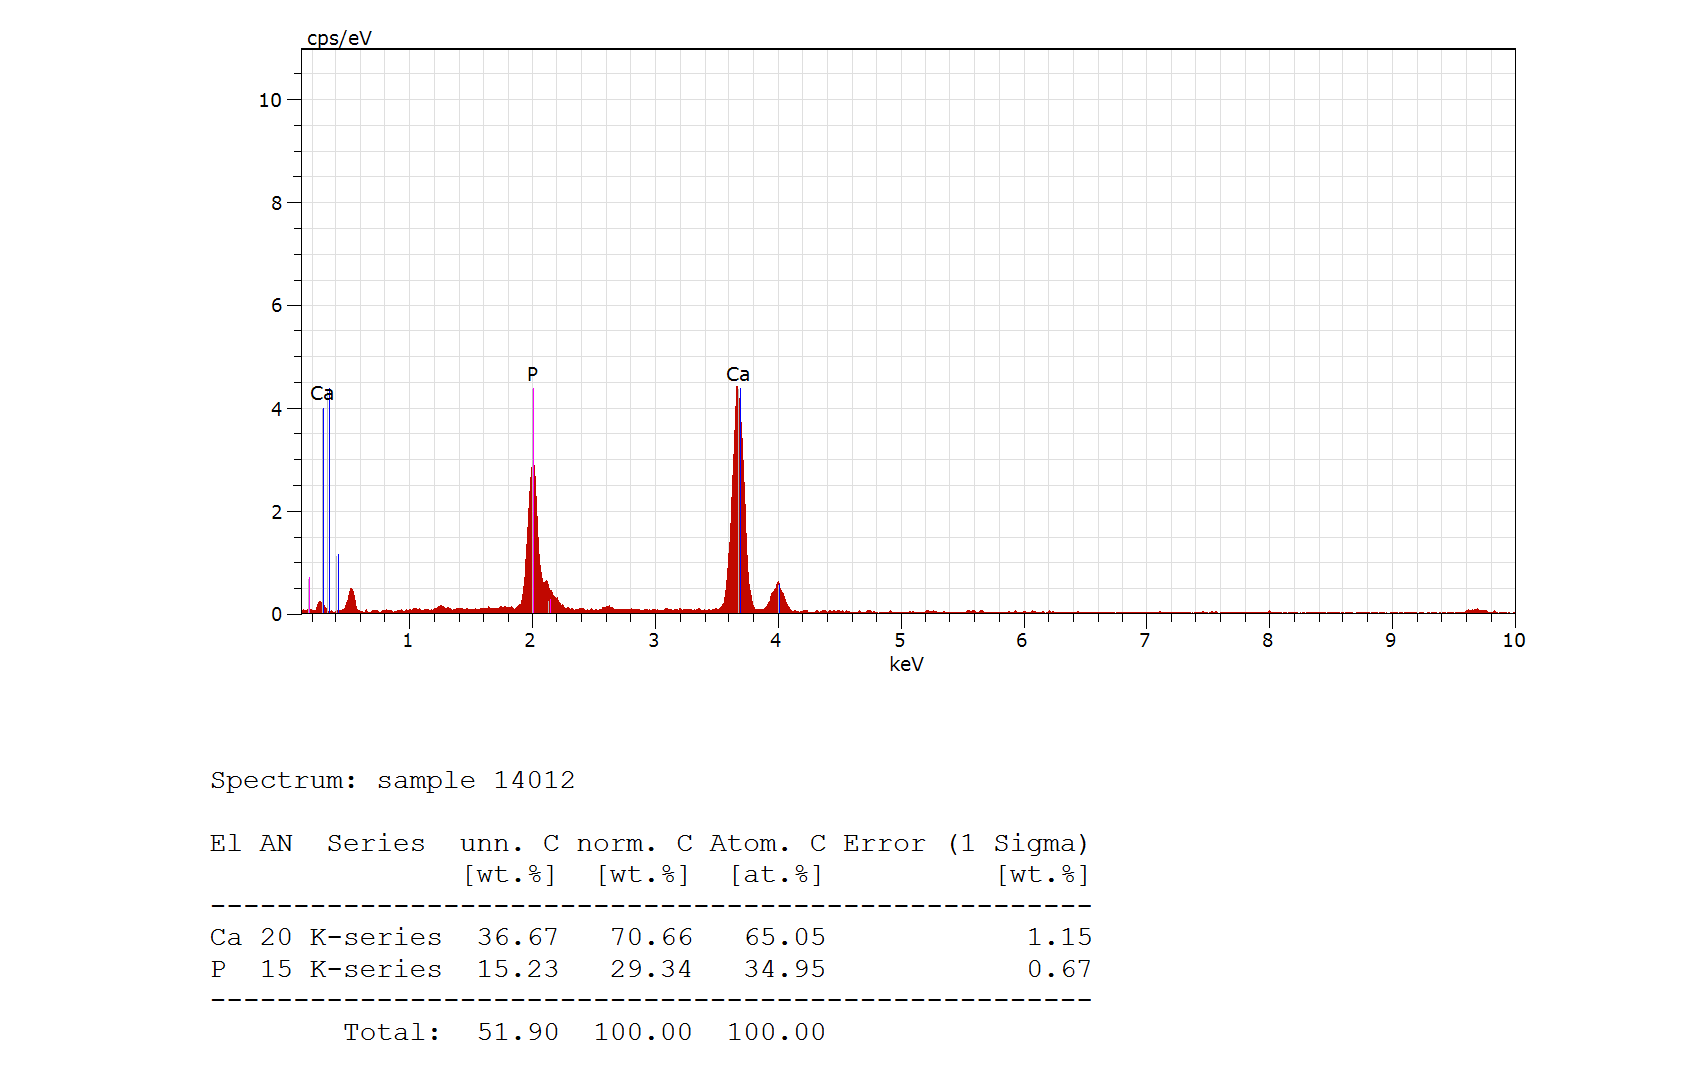

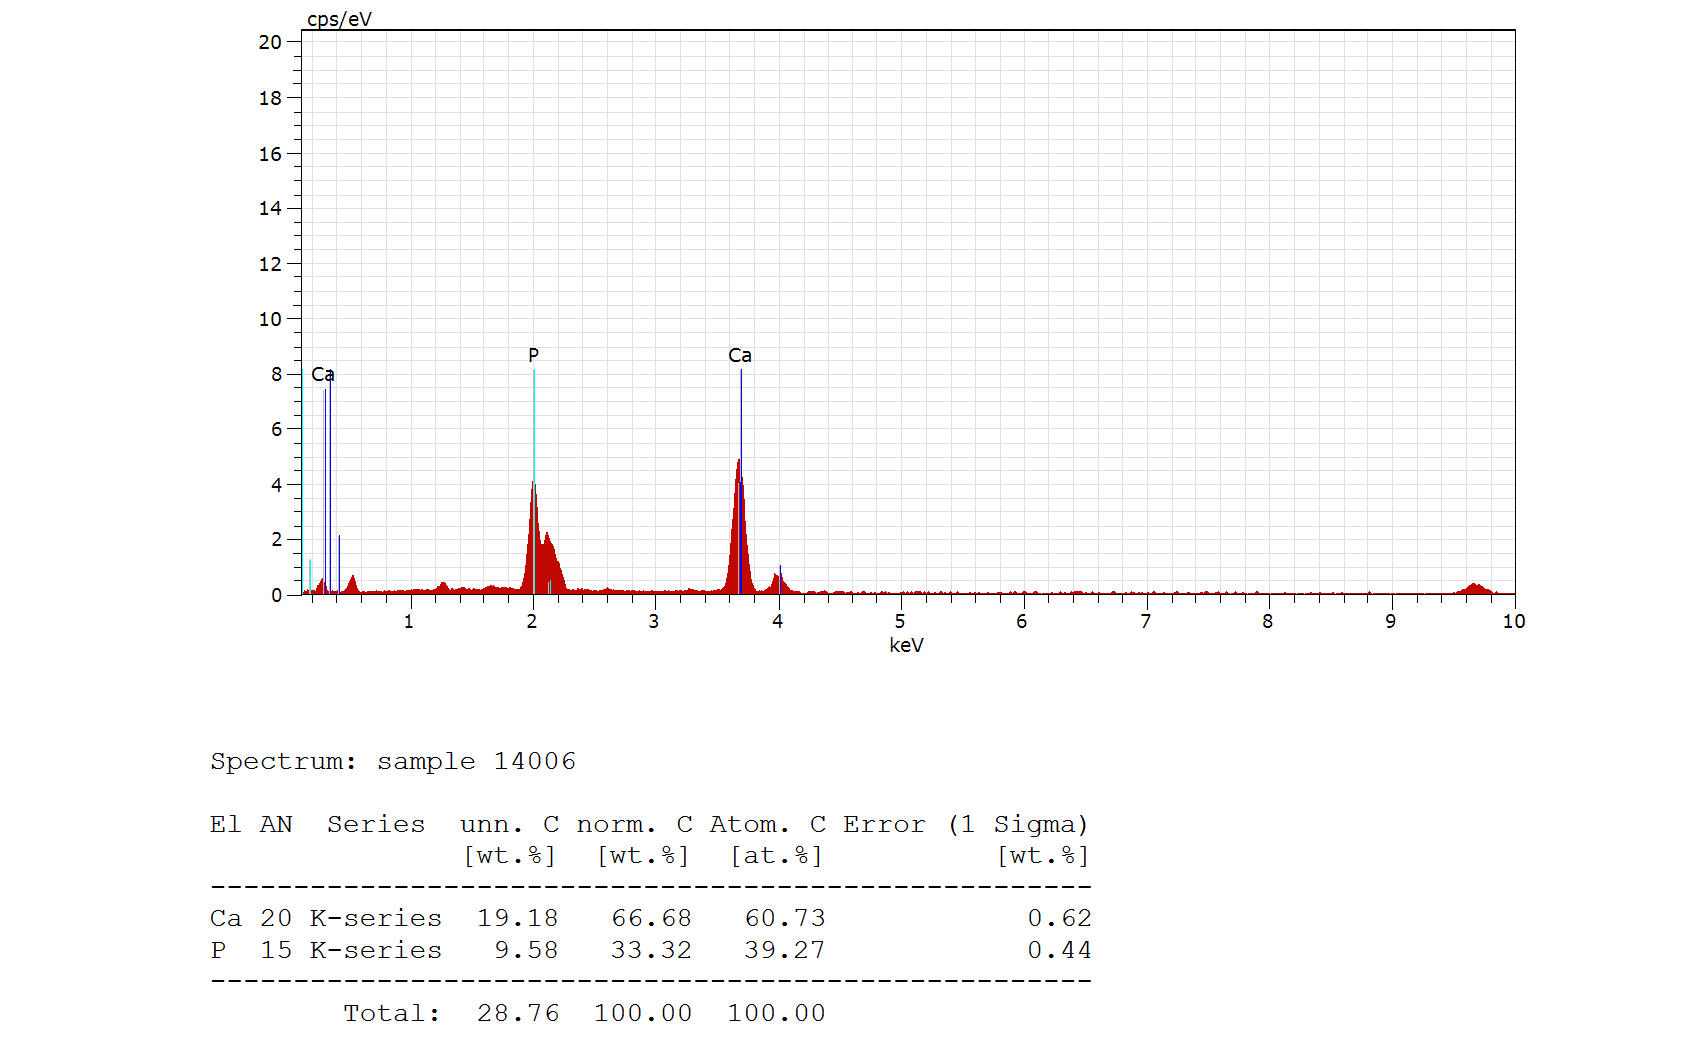


S4: GC Mousse


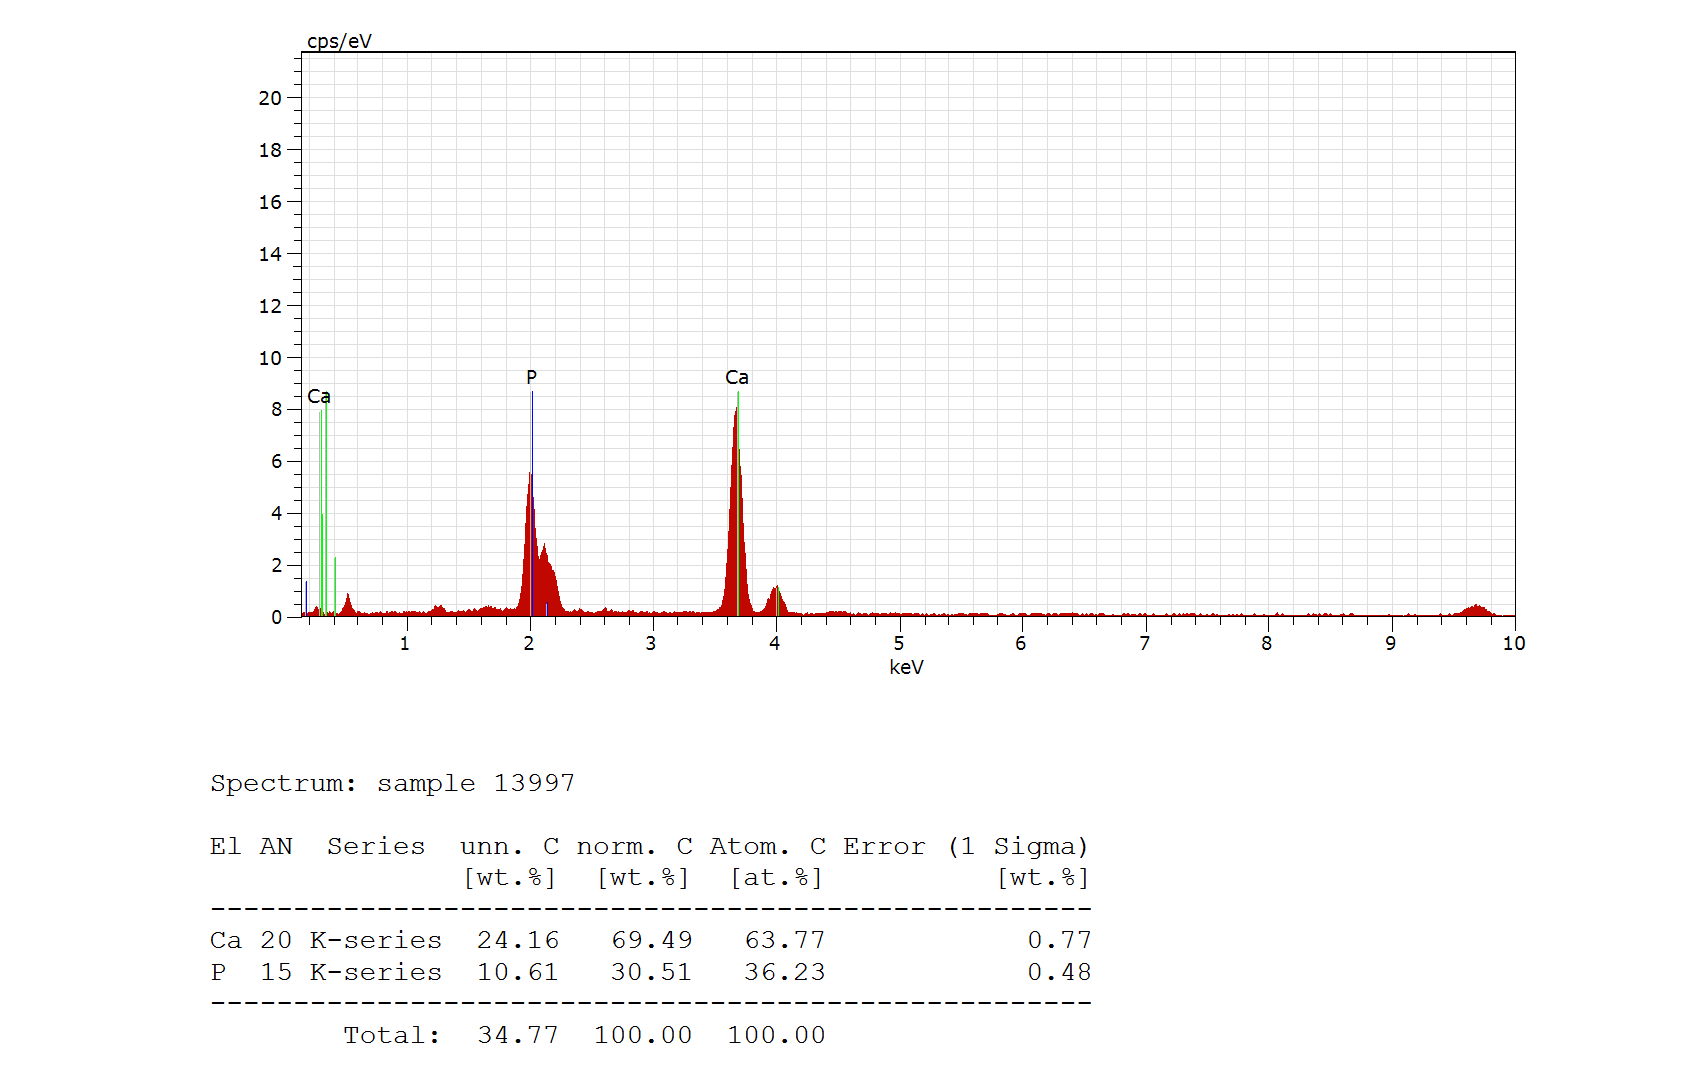

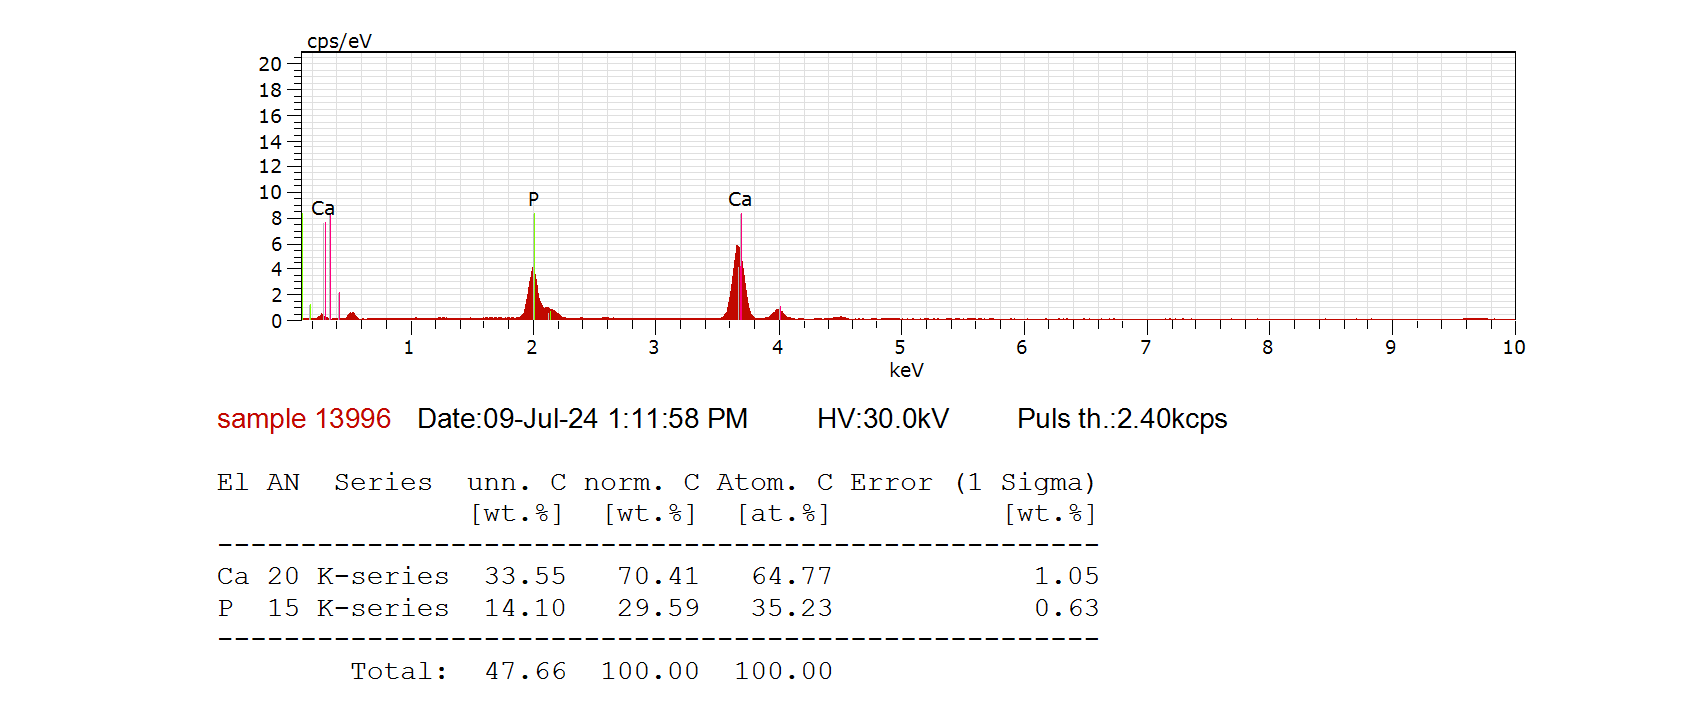


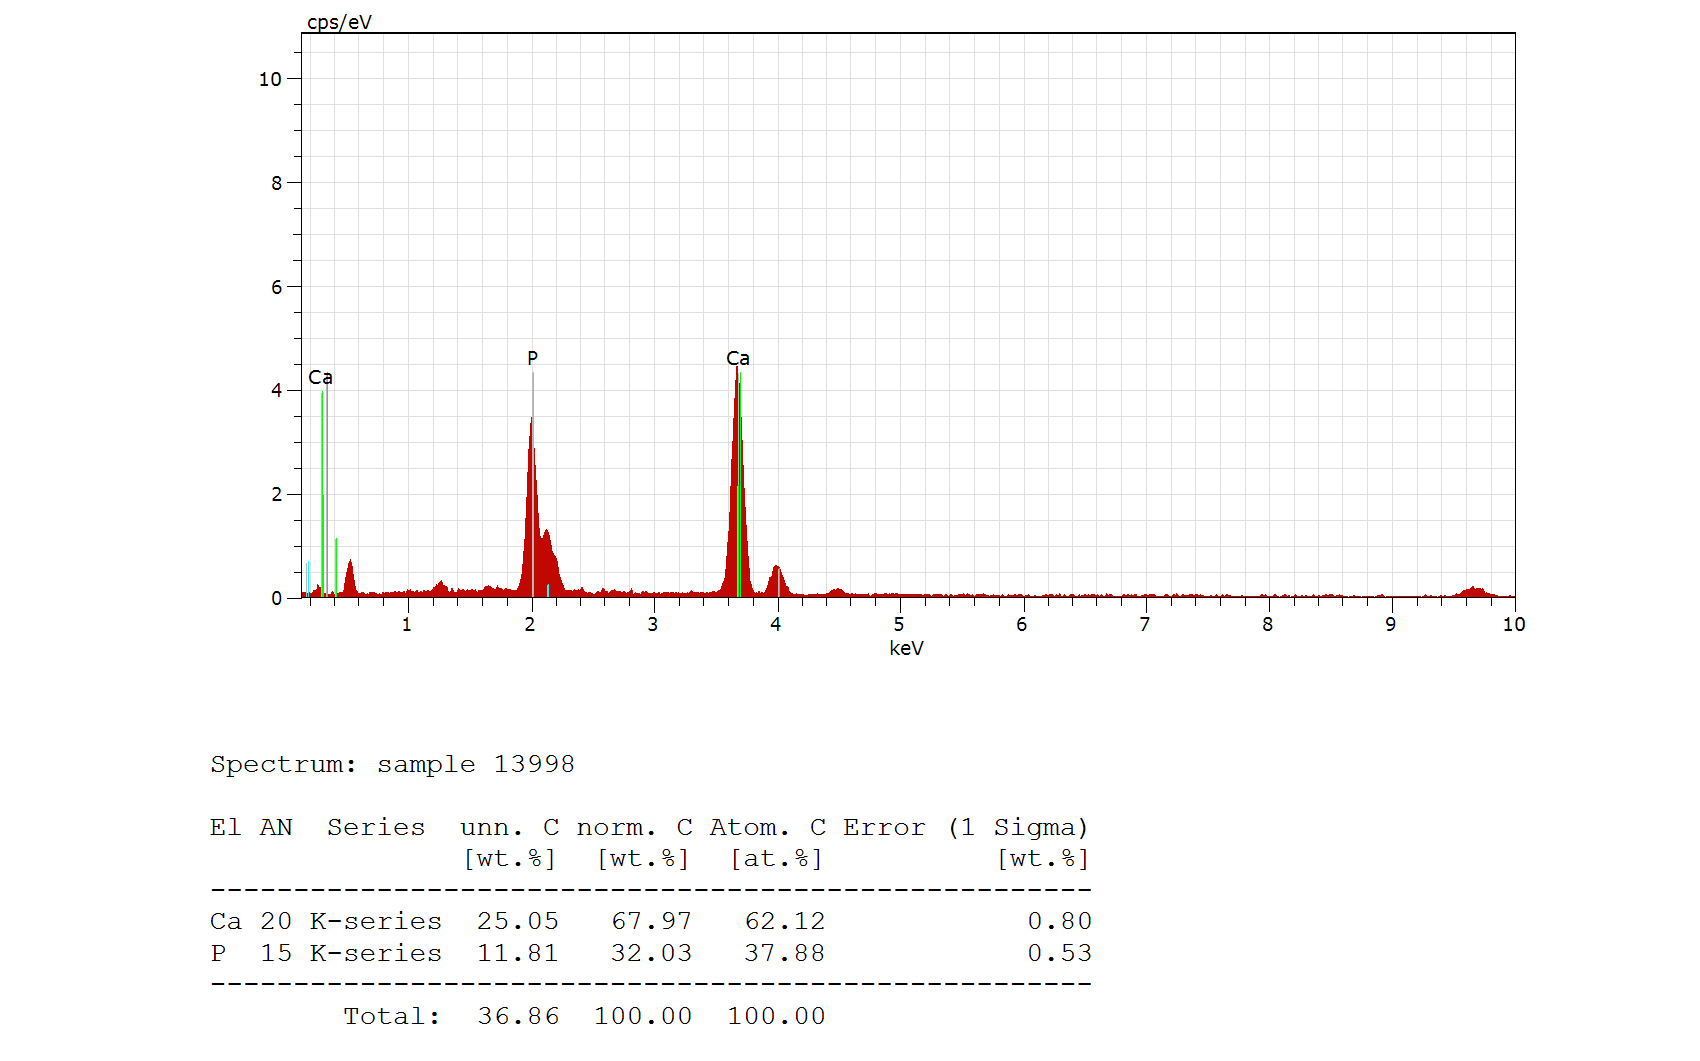

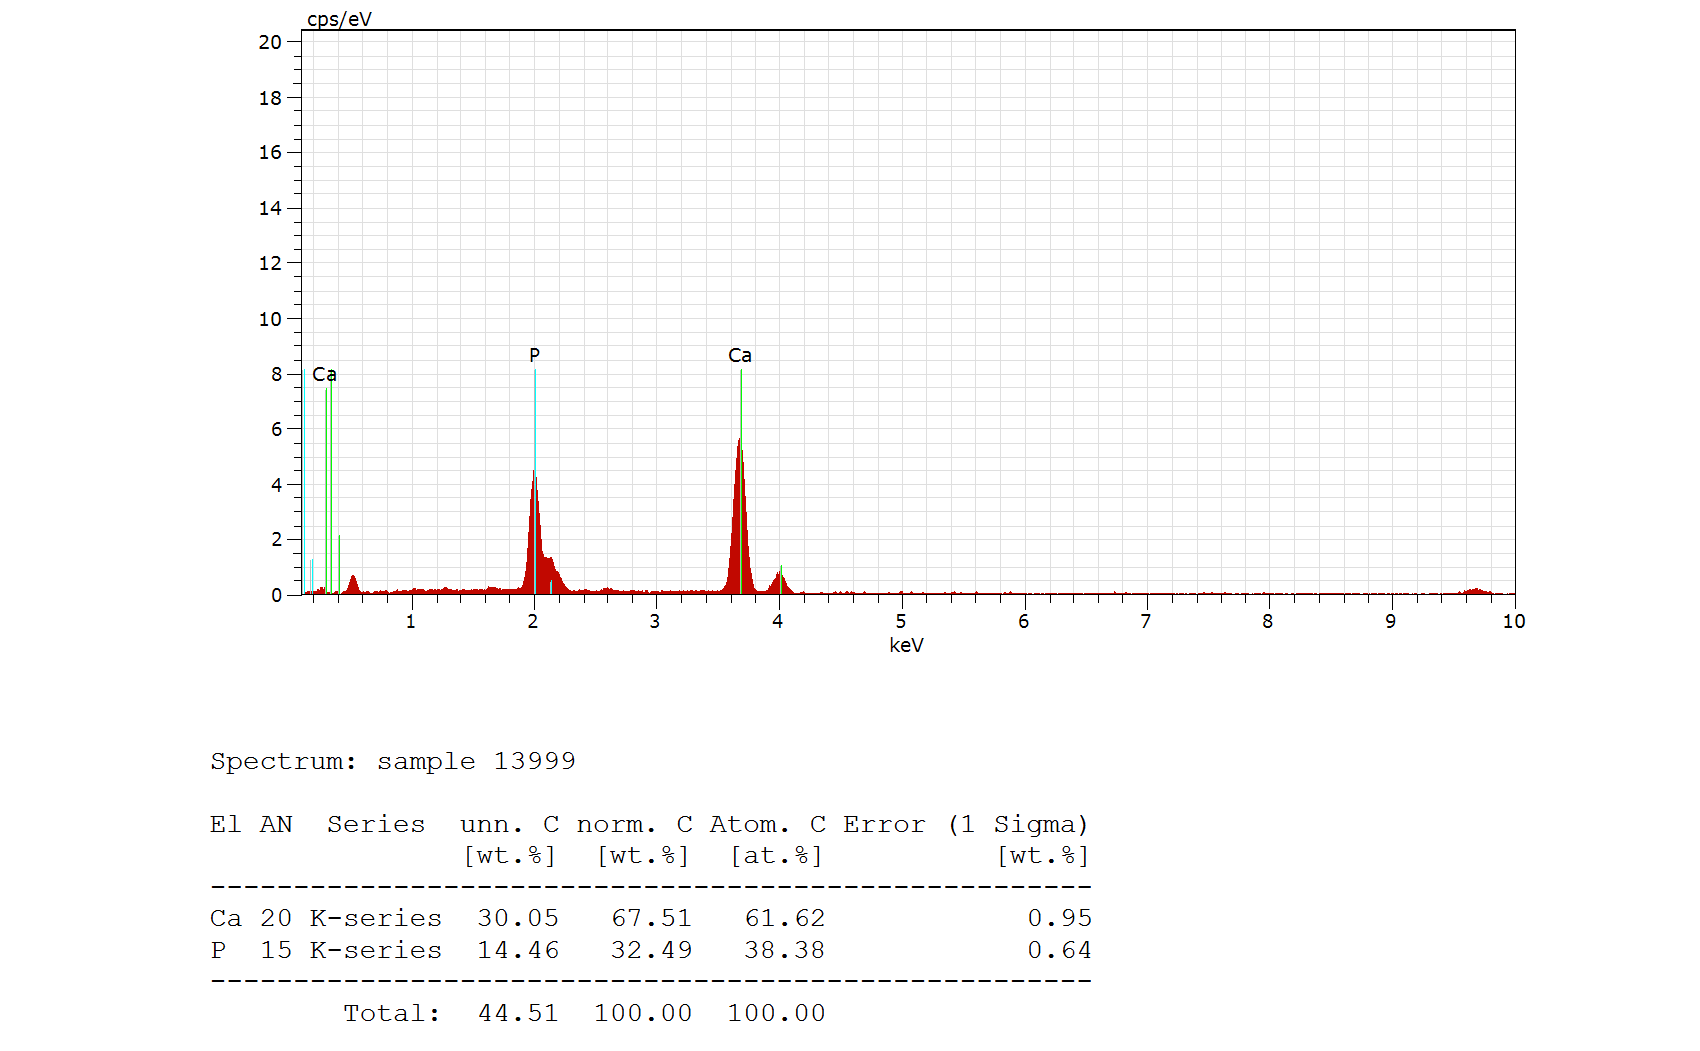


S5: Curodont


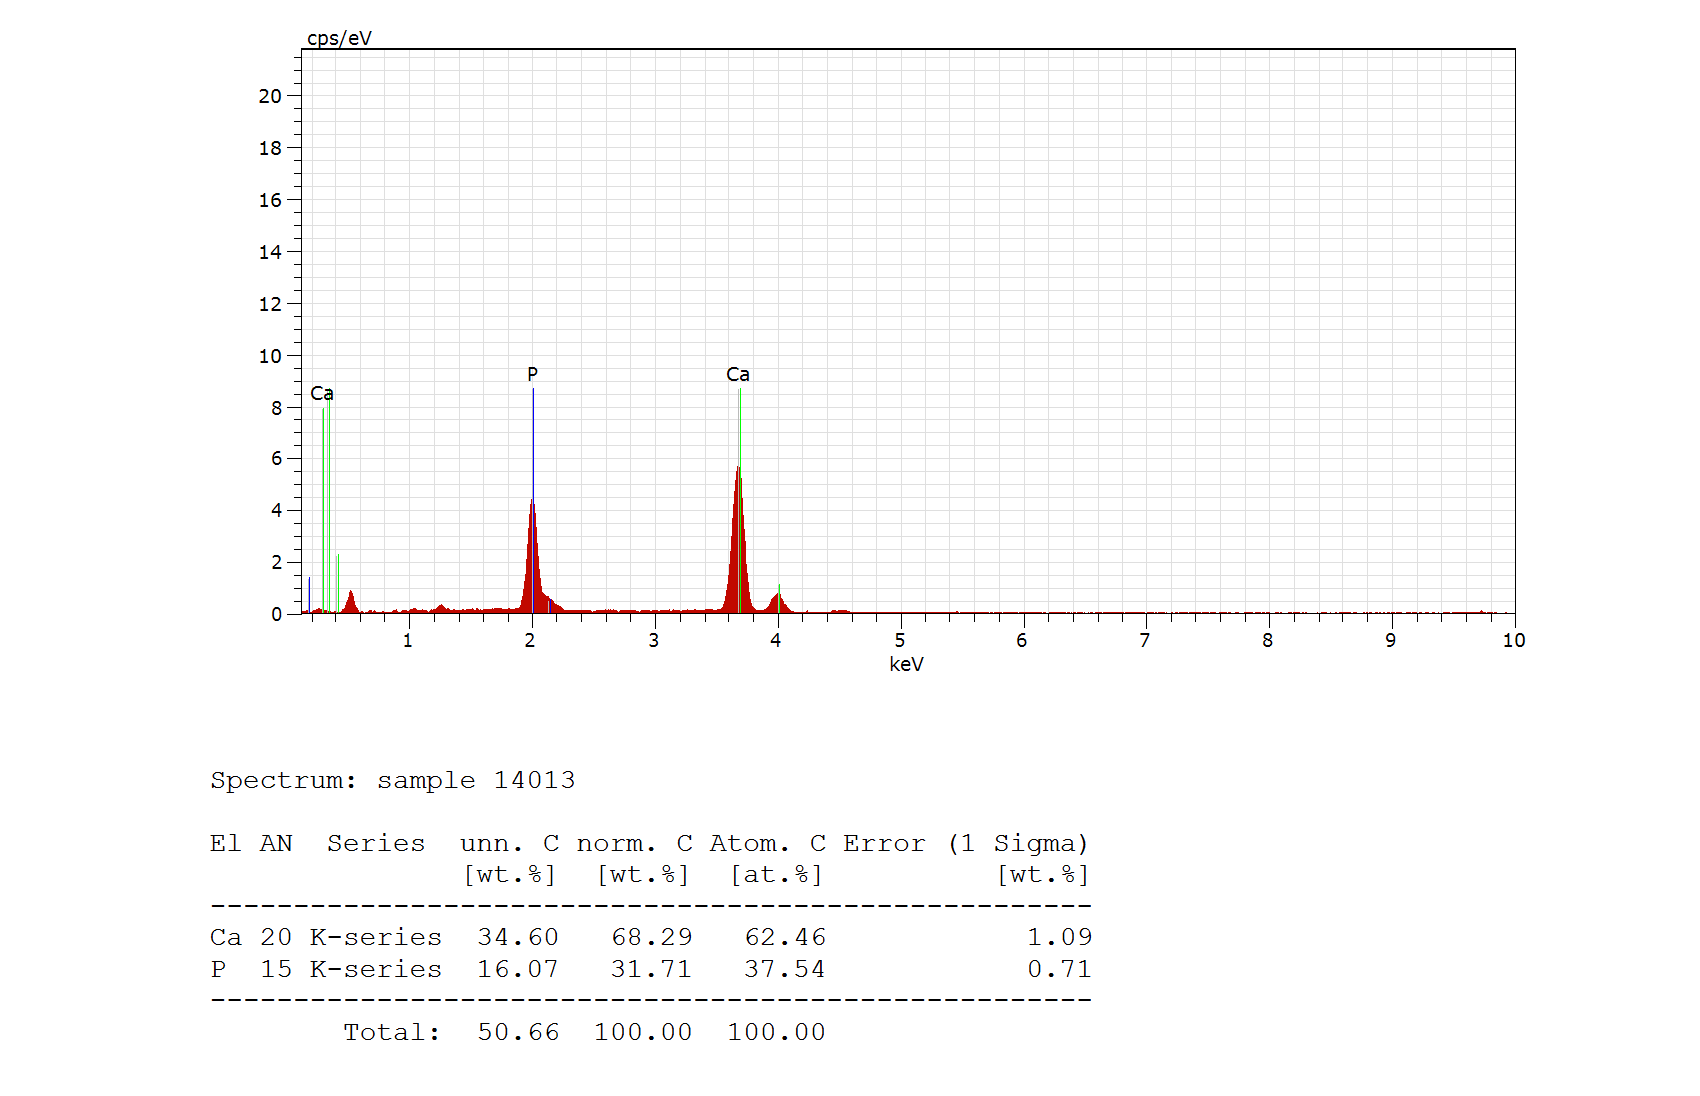

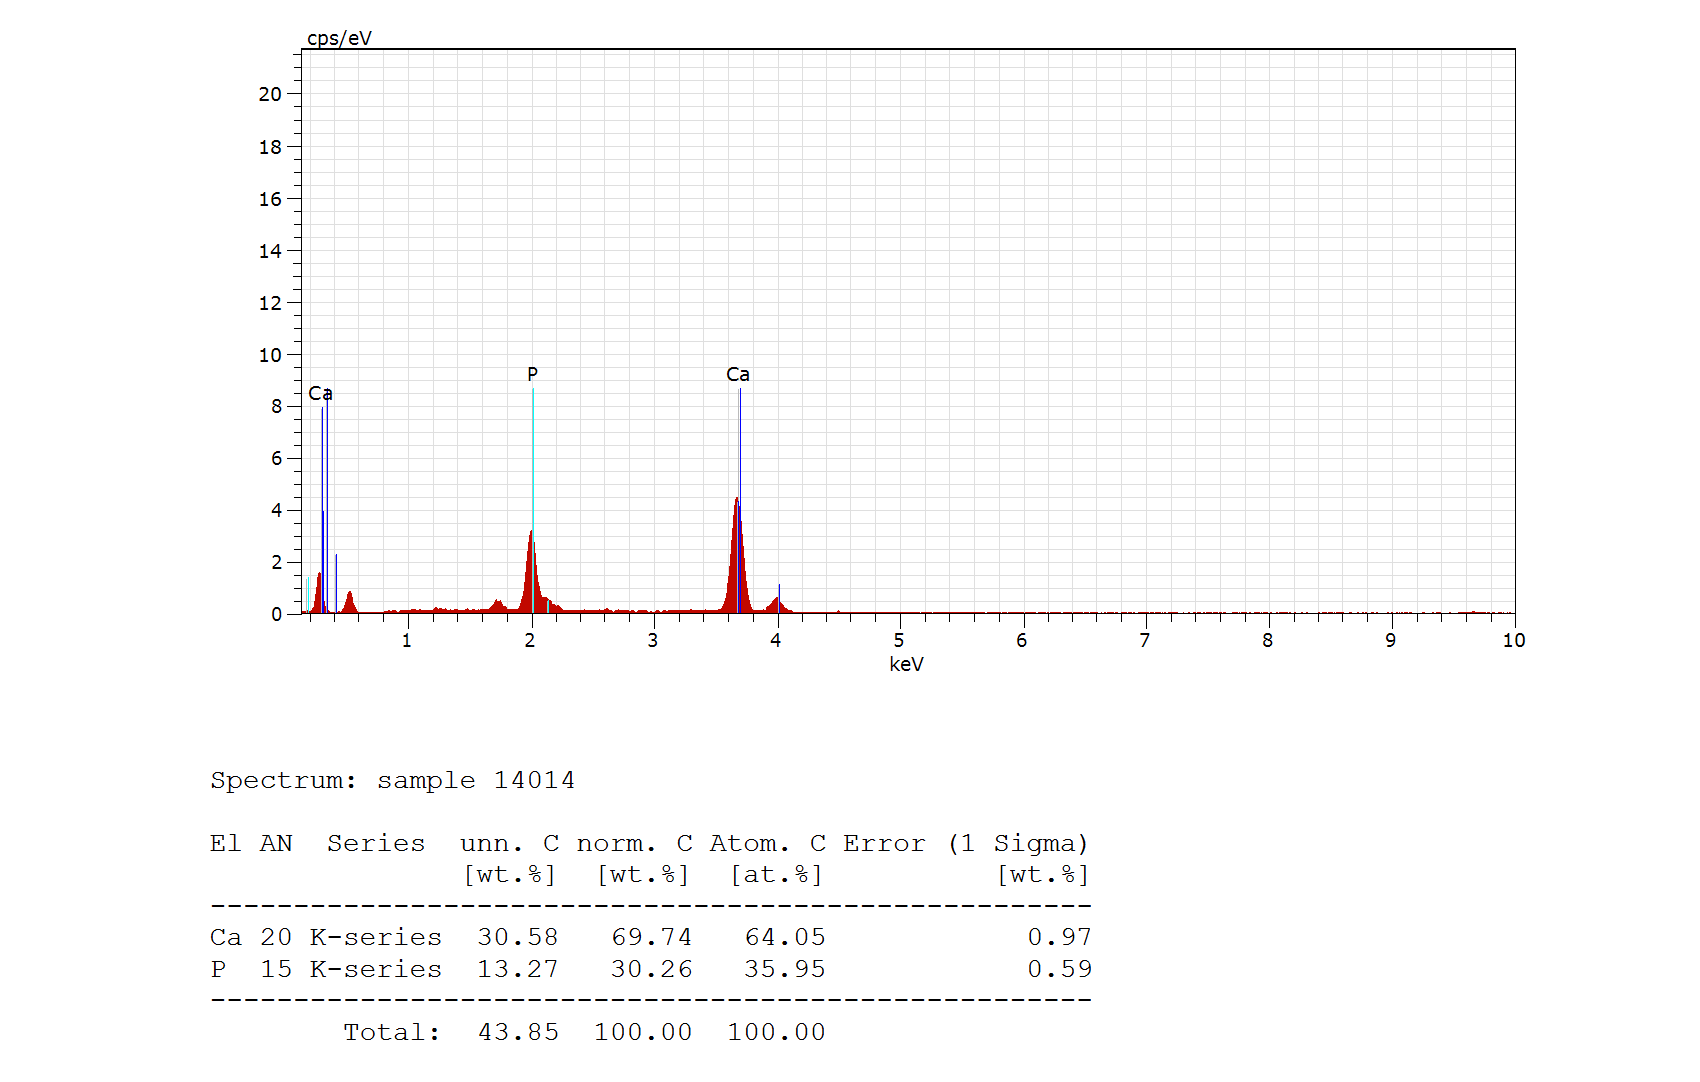

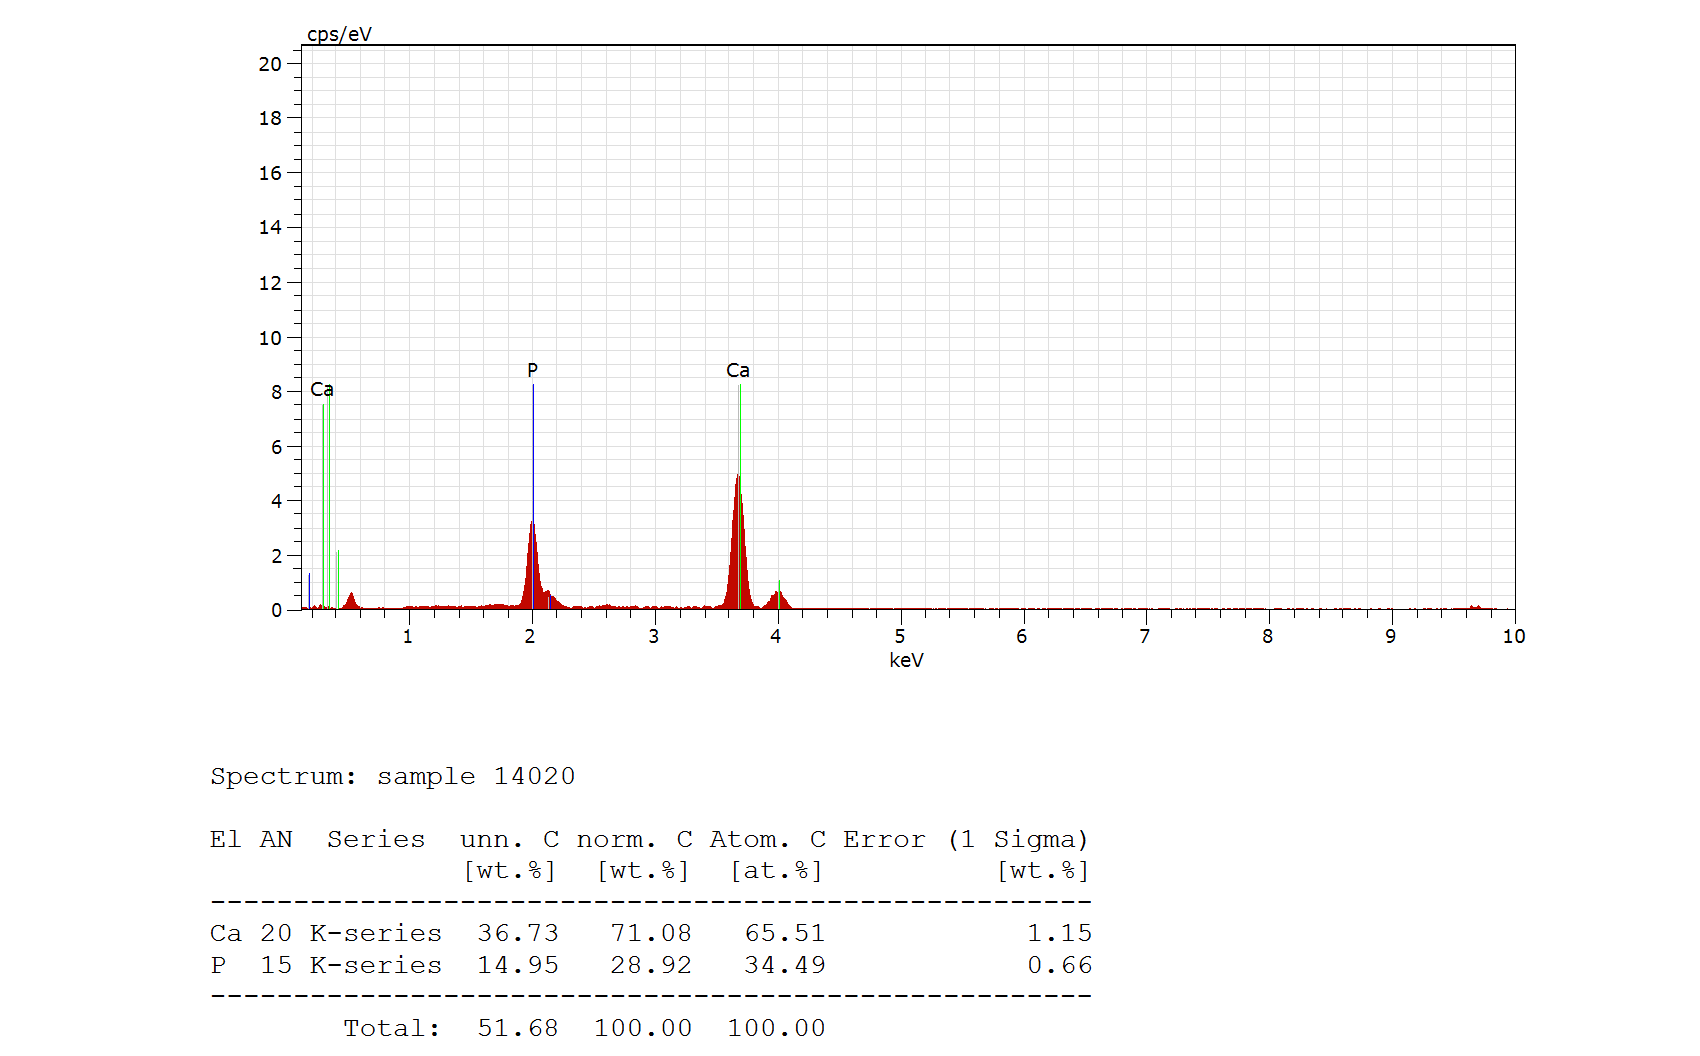

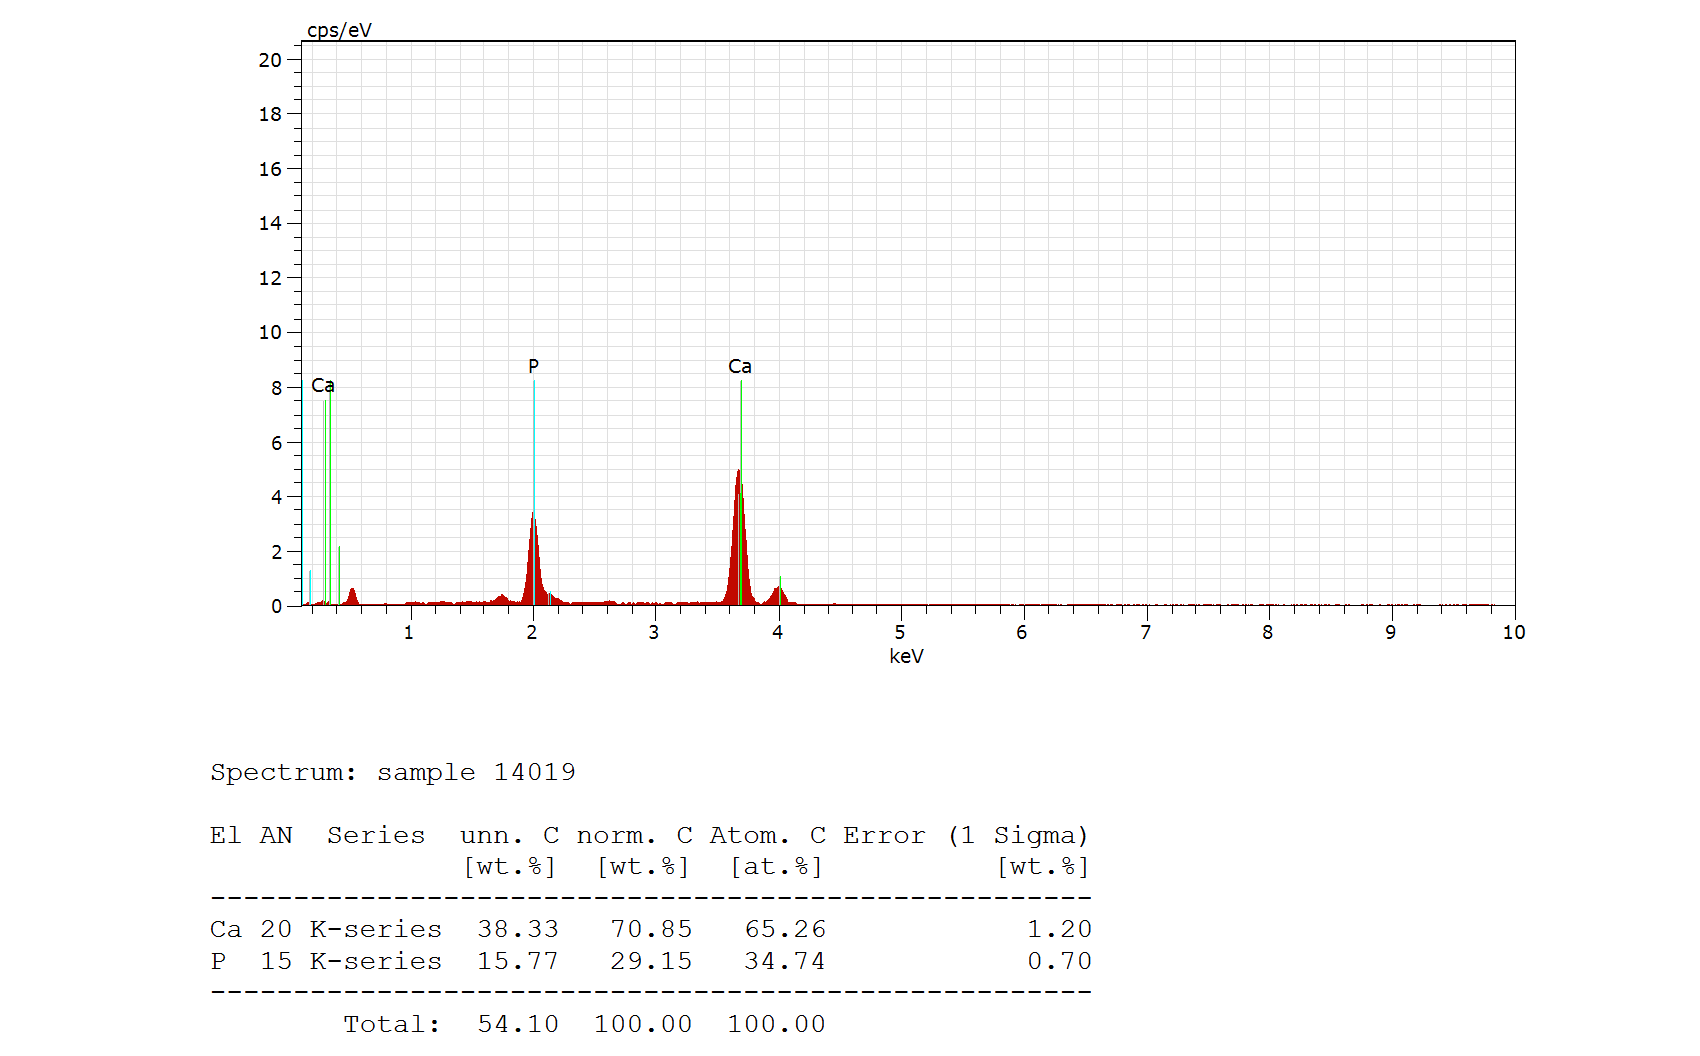

Supplement: Supplementary file 1 [file ea4fa7b9c487496190f42fae.docx]
